# Supplementary material for: The Effects of NAD+ on Apoptotic Neuronal Death and Mitochondrial Biogenesis and Function after Glutamate Excitotoxicity
Source: MDPI journal article supplement (doi:10.3390/ijms151120449), 2014-11-07

## Supplementary Information

**Figure S1.** Frequency distribution of mitochondrial length and area after glutamate stimulation. Frequency distribution of neuronal mitochondrial length (A) and area (B) before and after treatment of neurons with 30  $\mu\text{M}$  glutamate and 3  $\mu\text{M}$  glycine for 3, 6 and 24 h respectively. The values of histogram interval (bin) are 0.25  $\mu\text{m}$  for mitochondrial length and 0.5  $\mu\text{m}^2$  for mitochondrial area. Notice that glutamate treatment caused progressively increase in the number of small mitochondria and this effect was dependent on treatment time.

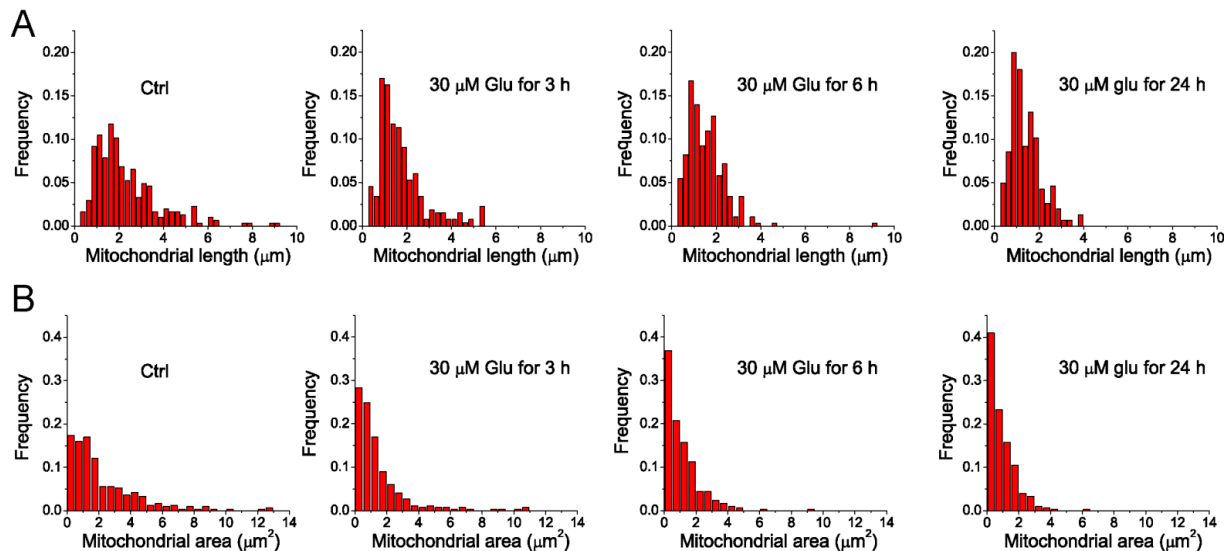

**Figure S2.** The effect of  $\text{NAD}^+$  on the frequency distribution of mitochondrial length and area during glutamate treatment. Frequency distributions of neuronal mitochondrial length (A) and area (B) before and after treatment of neurons with 30 mM glutamate and 3 mM glycine for 24 h in the presence or absence of 15 mM  $\text{NAD}^+$ . The values of histogram interval (bin) are 0.25  $\mu\text{m}$  for mitochondrial length and 0.5  $\mu\text{m}^2$  for mitochondrial area. Notice that  $\text{NAD}^+$  effectively reduced the decrease of mitochondrial length and area after glutamate stimulation.

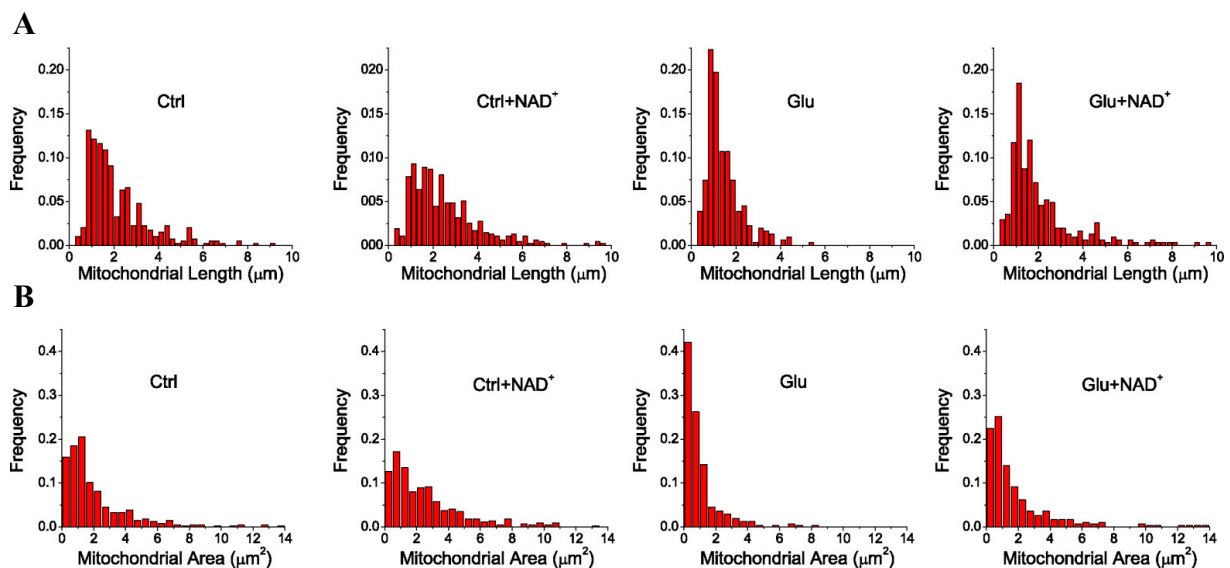

Supplement: s1 [file s1]
